# Supplementary material for: Mechanistic and Predictive QSAR Analysis of Diverse Molecules to Capture Salient and Hidden Pharmacophores for Anti-Thrombotic Activity
Source: MDPI journal article supplement (doi:10.3390/ijms22158352), 2021-08-03
Supplement: s1 [file s1]

**Figure S1:** Score plot after PCA using QSARINS 2.2.4.

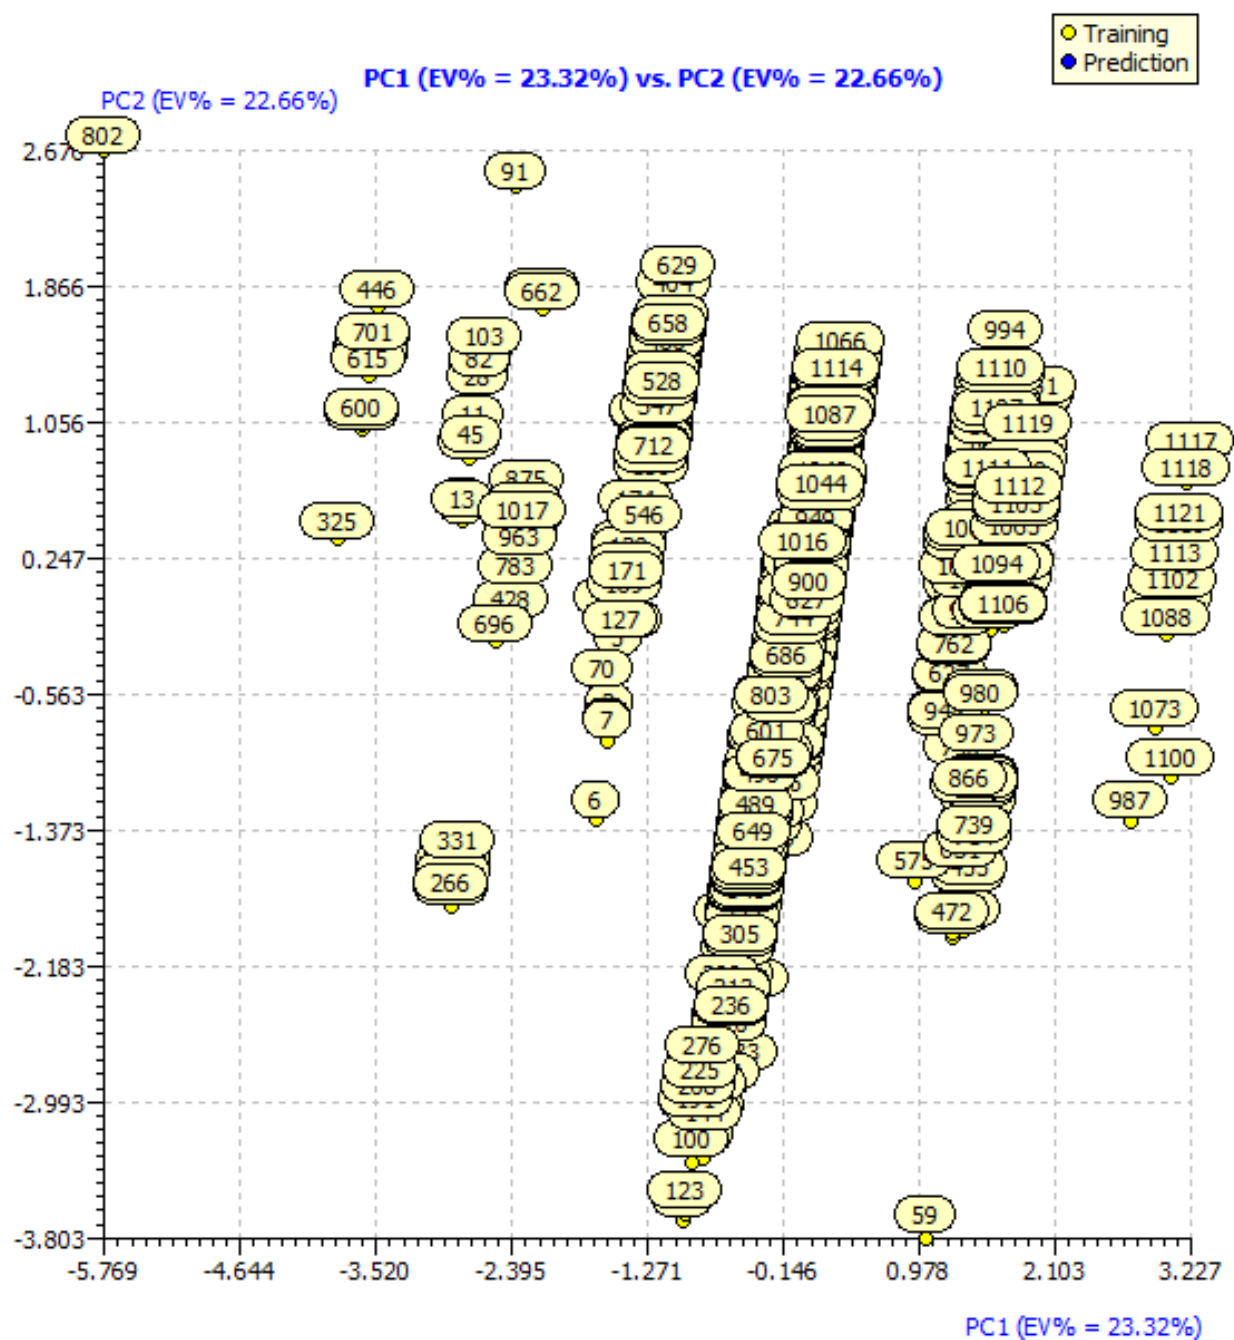

**Figure S2:** Loading plot after PCA using QSARINS 2.2.4.

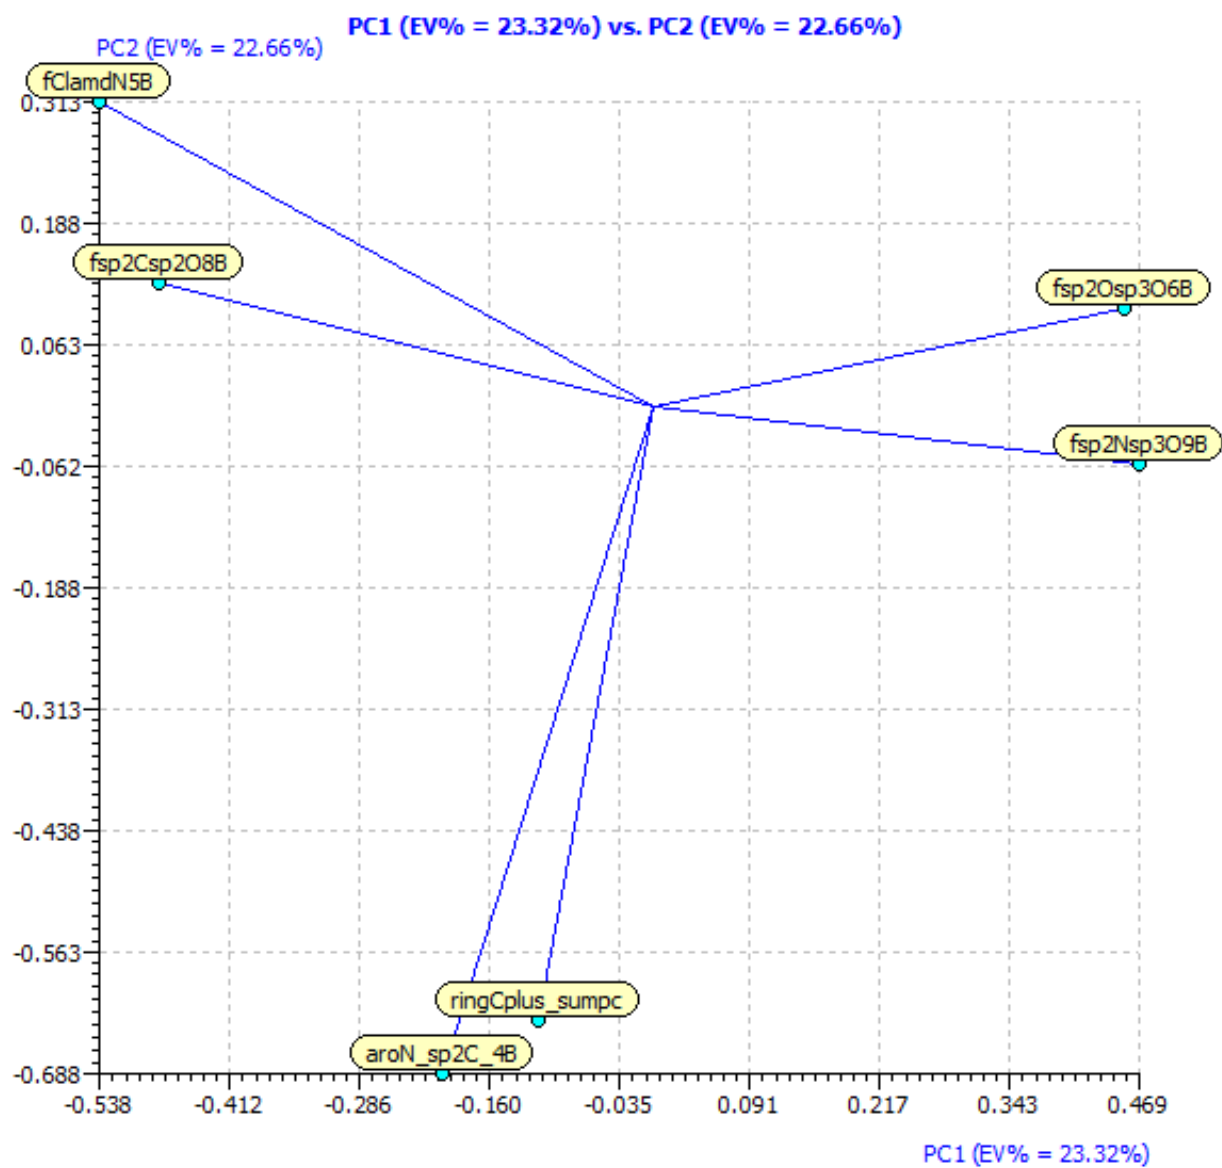

**Table S1:** Correlation matrix for molecular descriptors used in the present work.

|                 | ringCplus sumpc | aroN sp2C 4B | fClamdN5B | fsp2Osp3O6B | fsp2Nsp3O9B | fsp2Csp2O8B |
|-----------------|-----------------|--------------|-----------|-------------|-------------|-------------|
| ringCplus sumpc | 1.0000          |              |           |             |             |             |
| aroN sp2C 4B    | 0.3276          | 1.0000       |           |             |             |             |
| fClamdN5B       | -0.0310         | -0.0919      | 1.0000    |             |             |             |
| fsp2Osp3O6B     | -0.0023         | -0.1230      | -0.1140   | 1.0000      |             |             |
| fsp2Nsp3O9B     | 0.1461          | -0.1462      | -0.1224   | 0.1690      | 1.0000      |             |
| fsp2Csp2O8B     | 0.1302          | -0.0641      | 0.2671    | -0.0338     | -0.0648     | 1.0000      |

**Different validation parameters for model-1:**

$R^2_{tr} = 0.831$ ,  $R^2_{adj.} = 0.83$ ,  $LOF = 0.233$ ,  $K_{xx} = 0.188$ ,  $\Delta K = 0.07$ ,  $RMSE_{tr} = 0.476$ ,  $MAE_{tr} = 0.38$ ,  $RSS_{tr} = 203.239$ ,  
 $CCC_{tr} = 0.908$ ,  $s = 0.478$ ,  $F = 731.048$ ,  $R^2_{cv} (Q^2_{loo}) = 0.829$ ,  $RMSE_{cv} = 0.479$ ,  $MAE_{cv} = 0.383$ ,  $PRESS_{cv} = 206.131$ ,  
 $CCC_{cv} = 0.907$ ,  $Q^2_{LMO} = 0.828$ ,  $R^2_{Yscr} = 0.007$ ,  $Q^2_{Yscr} = -0.009$ ,  $RMSE_{ex} = 0.526$ ,  $MAE_{ex} = 0.417$ ,  $PRESS_{ext} = 61.945$ ,  
 $R^2_{ex} = 0.783$ ,  $Q^2-F^1 = 0.782$ ,  $Q^2-F^2 = 0.782$ ,  $Q^2-F^3 = 0.794$ ,  $CCC_{ex} = 0.874$ ,  $R^2-ExPy = 0.783$ ,  $R'^2_o = 0.704$ ,  $k' = 0.996$ ,  
 $1-(R^2/R'^2_o) = 0.101$ ,  $r'^2_m = 0.563$ ,  $R_o^2 = 0.782$ ,  $k = 0.999$ ,  $1-(R^2-ExPy/R_o^2) = 0.001$ ,  $r^2_m = 0.76$
